# Supplementary material for: Investigation of strain and doping on the electronic properties of single layers of C6N6 and C6N8: a first principles study
Source: RSC Adv. 2020 Jul 24;10(46):27743–51. doi: 10.1039/d0ra04463f (PMC9055606; doi:10.1039/d0ra04463f)
Supplement: RA-010-D0RA04463F-s001 [file RA-010-D0RA04463F-s001.pdf]

**Supplementary information// Investigation of doping and strain on the electronic properties of single layers of C<sub>6</sub>N<sub>6</sub> and C<sub>6</sub>N<sub>8</sub> : A first principles study**

Asadollah Bafekry <sup>\*1,2</sup>, C. Nguyen<sup>3</sup>, Abbas Goudarzi<sup>4</sup>, Mitra Ghergherehchi <sup>\*5</sup>, Mohsen shafieirad<sup>6</sup>

<sup>1</sup> Department of Physics, University of Guilan, 41335-1914 Rasht, Iran

<sup>2</sup>Department of Physics, University of Antwerp, Groenenborgerlaan 171, B-2020 Antwerp, Belgium.

<sup>3</sup>Department of Materials Science and Engineering, Le Quy Don Technical University, Ha Noi 100000, Vietnam.

<sup>4</sup>Department of Physics University of North Texas Denton, Texas, USA.

<sup>5</sup>College of Electronic and Electrical Engineering, Sungkyun kwan University, Suwon, Korea;

<sup>6</sup>Department of Electrical and Computer Engineering, University of Kashan, Kashan, Iran

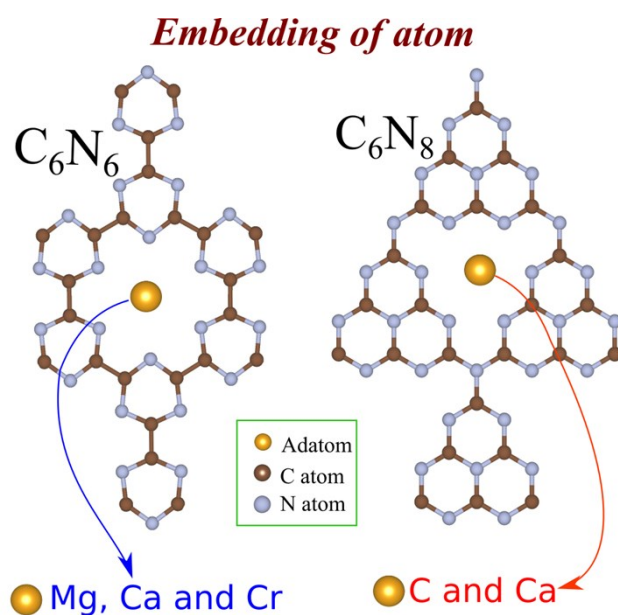

Fig. S1: : Schematic atomic structure for embedded atoms into C<sub>6</sub>N<sub>6</sub> (left) and C<sub>6</sub>N<sub>8</sub> (right).

A schematic view of the embedded atom into holey site of C<sub>6</sub>N<sub>6</sub> and C<sub>6</sub>N<sub>8</sub> monolayers are shown in Fig. S1. For the different atoms considered in our present study, the stable binding sites are uniformly at the nanopore.

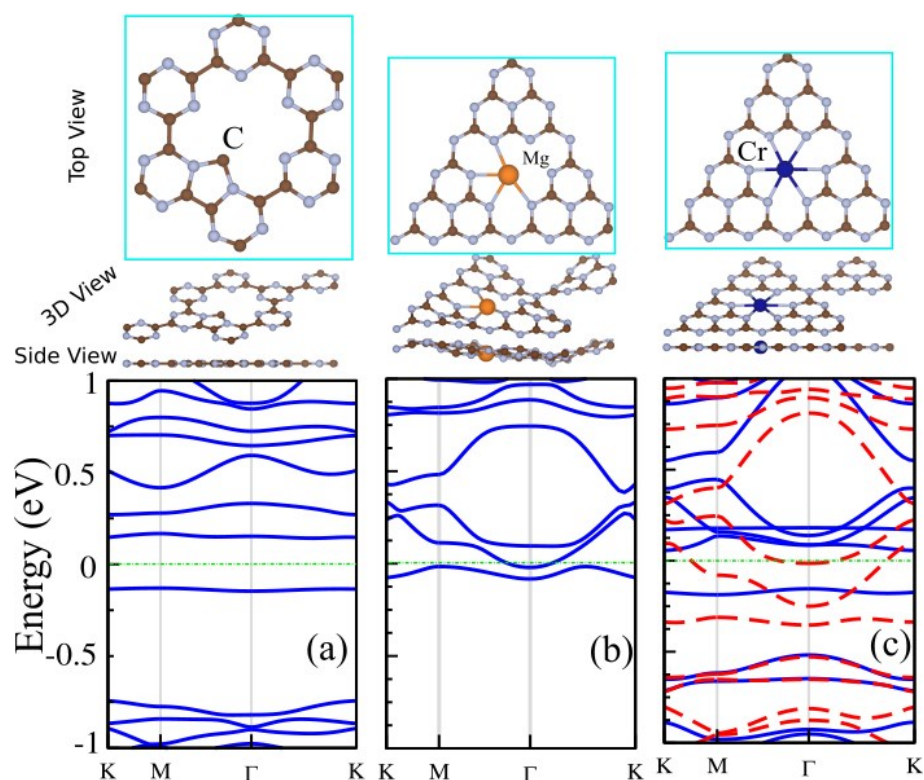

Fig. S2. Electronic structure of (a) C@C<sub>6</sub>N<sub>6</sub>, (b) Mg@C<sub>6</sub>N<sub>8</sub> and (c) Cr@C<sub>6</sub>N<sub>8</sub>. The zero of energy is set at Fermi-level. Top, 3D and side views of optimized structures of studied systems are shown in top of panel. The zero energy is set to the Fermi-level.

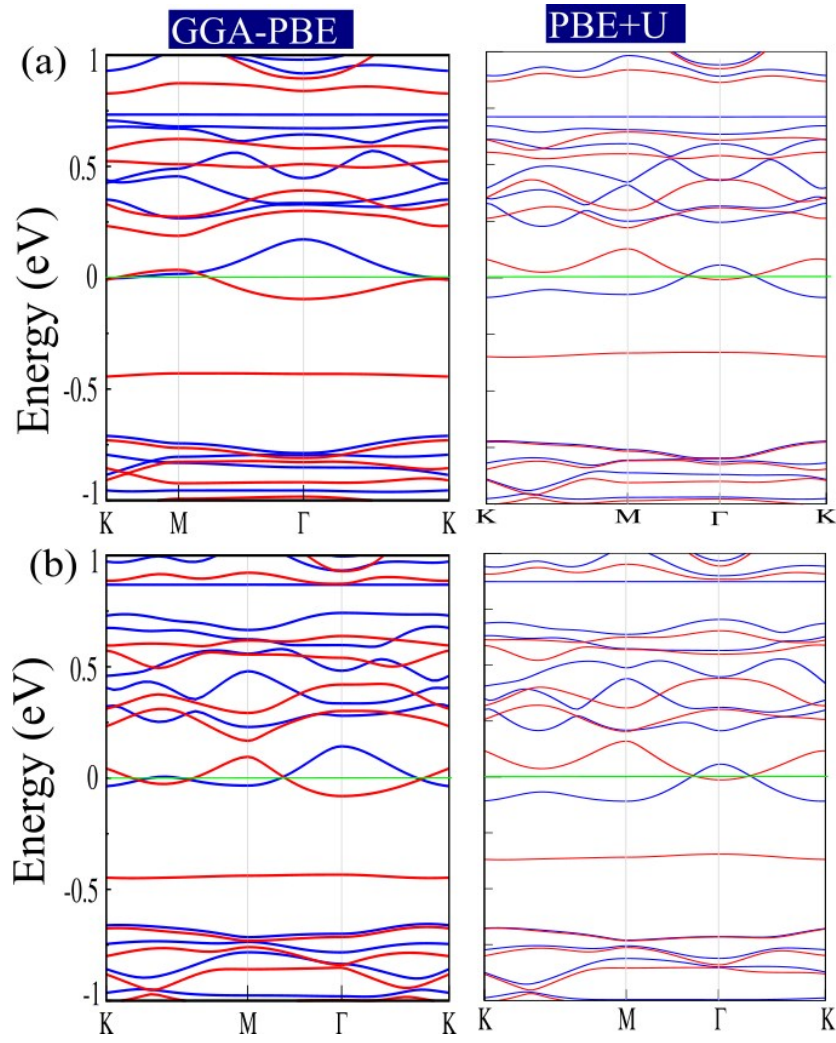

Fig. S3: Electronic structure of (a) Cr@ C6N6 , without and with considering of Hubbard U effect. (b) Cr@ C6N6 upon -2% strain, without and with U effect. The zero energy is set to the Fermi-level.

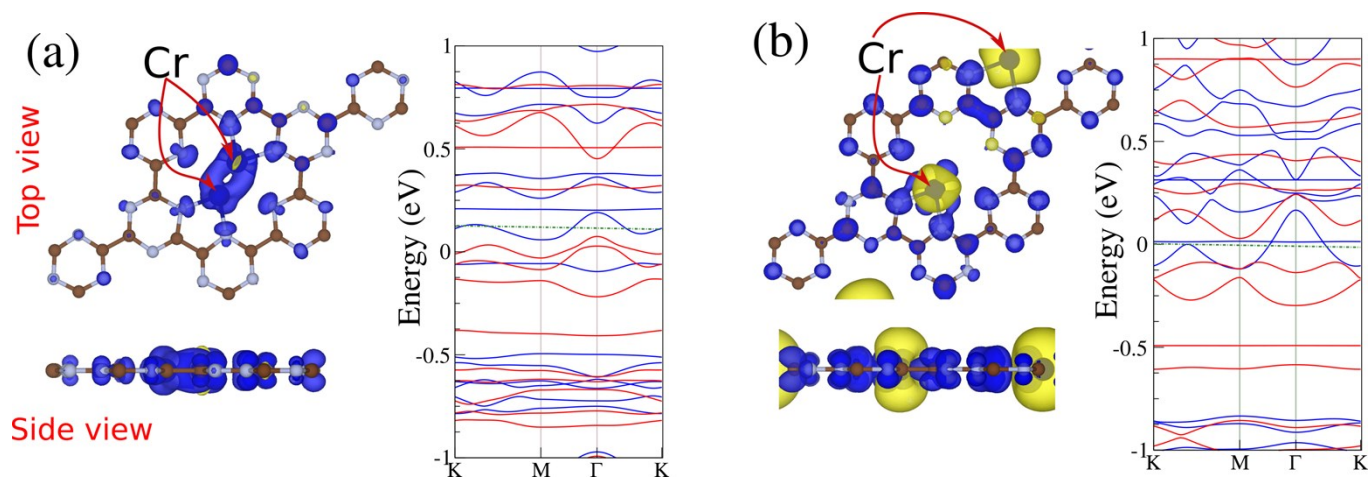

Fig. S4. Differences spin density of Cr embedded in (a) one and (b) two neighboring cavities of C<sub>6</sub>N<sub>6</sub>, positive and negative are represented by blue and yellow, respectively. Electronic band structure indicated in the left pannel.
